# Supplementary material
Source: HighWire-hosted journal article supplement (https://bmjopen.bmj.com/content/12/4/e059239)
Supplement: inline-supplementary-material-1 [file inline-supplementary-material-1.pdf]

**Supplementary Material for:** “Quality and Reliability Evaluation of Online Videos on Carpal Tunnel Syndrome: A YouTube Video-based Study”**Journal:** *BMJ Open***Authors:** Donghee Kwak, Jong Woong Park, Yousun Won, Yeongkeun Kwon, Jung Il Lee**Corresponding author:** Jung Il Lee, M.D., Ph.D.; Email: [osjungil@gmail.com](mailto:osjungil@gmail.com)**Supplementary Table 1.** Full list of video URLs included in the study

| Full list of video URLs |                         |                                                                     |                                                                                                       |
|-------------------------|-------------------------|---------------------------------------------------------------------|-------------------------------------------------------------------------------------------------------|
| Number                  | Channel Name            | Video Title                                                         | URLs                                                                                                  |
| 1                       | BroadcastMed Network    | Podcast: See a live surgery for carpal tunnel syndrome              | <a href="https://www.youtube.com/watch?v=XCcplgeQzrU">https://www.youtube.com/watch?v=XCcplgeQzrU</a> |
| 2                       | David Kuckhermann       | exercises for tendinitis (tendonitis) and carpal tunnel (cps)       | <a href="https://www.youtube.com/watch?v=hUyMNyrOHJQ">https://www.youtube.com/watch?v=hUyMNyrOHJQ</a> |
| 3                       | Dr. Josh Axe            | How to Get Natural Carpal Tunnel Relief in 24 Hours   Dr. Josh Axe  | <a href="https://www.youtube.com/watch?v=LTKyioqoZVM">https://www.youtube.com/watch?v=LTKyioqoZVM</a> |
| 4                       | KT Tape                 | KT Tape: Carpal Tunnel                                              | <a href="https://www.youtube.com/watch?v=FAWu0_SWdHM">https://www.youtube.com/watch?v=FAWu0_SWdHM</a> |
| 5                       | Nucleus Medical Media   | Carpal Tunnel Syndrome   Nucleus Health                             | <a href="https://www.youtube.com/watch?v=z-SeJh5-nOo">https://www.youtube.com/watch?v=z-SeJh5-nOo</a> |
| 6                       | Madden Physical Therapy | Top 3 Exercises for Carpal Tunnel Syndrome                          | <a href="https://www.youtube.com/watch?v=gTxQqu9USC4">https://www.youtube.com/watch?v=gTxQqu9USC4</a> |
| 7                       | Cleveland Clinic        | Worried About Carpal Tunnel? Try 3 Simple Stretches                 | <a href="https://www.youtube.com/watch?v=f2lHpWNaQaQ">https://www.youtube.com/watch?v=f2lHpWNaQaQ</a> |
| 8                       | AskDoctorJo             | 5 Best Carpal Tunnel Syndrome Stretches & Exercises - Ask Doctor Jo | <a href="https://www.youtube.com/watch?v=Q5G916yCyF0">https://www.youtube.com/watch?v=Q5G916yCyF0</a> |
| 9                       | LoseTheBackPain         | Self Acupressure for Carpal Tunnel Syndrome                         | <a href="https://www.youtube.com/watch?v=0GtGmf6Z760">https://www.youtube.com/watch?v=0GtGmf6Z760</a> |
| 10                      | Dr Thomas McClellan     | Live Surgery Open Carpal Tunnel Release Surgery.m4v                 | <a href="https://www.youtube.com/watch?v=YVPe5WT15yg">https://www.youtube.com/watch?v=YVPe5WT15yg</a> |

|    |                       |                                                                                                   |                                                                                                       |
|----|-----------------------|---------------------------------------------------------------------------------------------------|-------------------------------------------------------------------------------------------------------|
| 11 | Armando Hasudungan    | Clinical Anatomy - Hand, Wrist (palmar aspect/flexors)                                            | <a href="https://www.youtube.com/watch?v=3aIHxXqKzcU">https://www.youtube.com/watch?v=3aIHxXqKzcU</a> |
| 12 | HM Massage            | Carpal Tunnel Self Massage Fix                                                                    | <a href="https://www.youtube.com/watch?v=kkQs9ytO20M">https://www.youtube.com/watch?v=kkQs9ytO20M</a> |
| 13 | TheProactiveAthlete   | Carpal Tunnel Syndrome Exercises                                                                  | <a href="https://www.youtube.com/watch?v=B5goXA9MqCA">https://www.youtube.com/watch?v=B5goXA9MqCA</a> |
| 14 | j7conley              | Carpal Tunnel Treatment - Relief Without Surgery                                                  | <a href="https://www.youtube.com/watch?v=ni95m_2ntR0">https://www.youtube.com/watch?v=ni95m_2ntR0</a> |
| 15 | Blitz Esports LoL     | Carpal Tunnel in Esports, explained in 5 minutes                                                  | <a href="https://www.youtube.com/watch?v=aHG9HX5kl6M">https://www.youtube.com/watch?v=aHG9HX5kl6M</a> |
| 16 | WorkSafeBC            | Carpal Tunnel Syndrome                                                                            | <a href="https://www.youtube.com/watch?v=J11EfiHMYw">https://www.youtube.com/watch?v=J11EfiHMYw</a>   |
| 17 | TheSurgerySquad       | Carpal Tunnel Surgery                                                                             | <a href="https://www.youtube.com/watch?v=_p799CipRL0">https://www.youtube.com/watch?v=_p799CipRL0</a> |
| 18 | Physiotutors          | Phalen's Test  Carpal Tunnel Syndrome                                                             | <a href="https://www.youtube.com/watch?v=rQJNrKq7tIs">https://www.youtube.com/watch?v=rQJNrKq7tIs</a> |
| 19 | Carpal Tunnel Gadgets | Carpal Tunnel Exercises using Stress Ball                                                         | <a href="https://www.youtube.com/watch?v=zLgyubFK-BM">https://www.youtube.com/watch?v=zLgyubFK-BM</a> |
| 20 | Physiotutors          | Tinel Sign: Wrist  Carpal Tunnel Syndrome                                                         | <a href="https://www.youtube.com/watch?v=U8cPjPeZgFw">https://www.youtube.com/watch?v=U8cPjPeZgFw</a> |
| 21 | Road                  | Wrist Exercises for Tendinitis Carpal Tunnel Syndrome - Avoid RSI injury in just 2 minutes a day! | <a href="https://www.youtube.com/watch?v=fdD7CgN5FGg">https://www.youtube.com/watch?v=fdD7CgN5FGg</a> |
| 22 | Bob & Brad            | Carpal Tunnel? Avoid Surgery with 3 Step Self-Treatment Program                                   | <a href="https://www.youtube.com/watch?v=B-5c5yyySnU">https://www.youtube.com/watch?v=B-5c5yyySnU</a> |
| 23 | ZHealthPerformance    | Carpal Tunnel Relief Exercises                                                                    | <a href="https://www.youtube.com/watch?v=BHfKutz21do">https://www.youtube.com/watch?v=BHfKutz21do</a> |
| 24 | Carpal Tunnel Gadgets | Hand Massage for Carpal Tunnel Syndrome                                                           | <a href="https://www.youtube.com/watch?v=yVXW6m3EDOk">https://www.youtube.com/watch?v=yVXW6m3EDOk</a> |
| 25 | Dr Levi Harrison      | Is It Carpal Tunnel Syndrome OR Tendonitis?                                                       | <a href="https://www.youtube.com/watch?v=YCc_eIrjeFk">https://www.youtube.com/watch?v=YCc_eIrjeFk</a> |
| 26 | Yoga with Kassandra   | Yoga for Wrists & Fingers - Yoga for Wrist Cramps & Carpal Tunnel                                 | <a href="https://www.youtube.com/watch?v=tSD35Q15rm8">https://www.youtube.com/watch?v=tSD35Q15rm8</a> |
| 27 | nabil ebraheim        | Carpal Tunnel Syndrome - Everything You Need To                                                   | <a href="https://www.youtube.com/watch?v=tjyU55ilshQ">https://www.youtube.com/watch?v=tjyU55ilshQ</a> |

|    |                             |                                                                                     |                                                                                                       |
|----|-----------------------------|-------------------------------------------------------------------------------------|-------------------------------------------------------------------------------------------------------|
|    |                             | Know - Dr. Nabil Ebraheim                                                           |                                                                                                       |
| 28 | Dr Joseph Cipriano DC       | *HUGE* Carpal Tunnel Syndrome RELEASE with CHIROPRACTIC Adjustment                  | <a href="https://www.youtube.com/watch?v=YMUBlaVChOs">https://www.youtube.com/watch?v=YMUBlaVChOs</a> |
| 29 | Bob & Brad                  | Best Sleeping Position for Shoulder, Arm, & Wrist Pain- also Carpal Tunnel Syndrome | <a href="https://www.youtube.com/watch?v=YZLMpSGOz34">https://www.youtube.com/watch?v=YZLMpSGOz34</a> |
| 30 | Vitality Massage            | Massage for Carpal Tunnel Syndrome - STOP Wrist Pain Fast!                          | <a href="https://www.youtube.com/watch?v=30Aq24-xp2c">https://www.youtube.com/watch?v=30Aq24-xp2c</a> |
| 31 | motivationaldoc             | Carpal Tunnel Self-Correction Adjustment - Dr. Alan Mandell, D.C.                   | <a href="https://www.youtube.com/watch?v=iHVtzOCgy0Y">https://www.youtube.com/watch?v=iHVtzOCgy0Y</a> |
| 32 | Bob & Brad                  | What They Don't Tell You About Carpal Tunnel Syndrome! Stretches & Treatments       | <a href="https://www.youtube.com/watch?v=n26CXK6xZek">https://www.youtube.com/watch?v=n26CXK6xZek</a> |
| 33 | RMCrayne                    | Carpal Tunnel Syndrome Provocative Tests & Physical Exam                            | <a href="https://www.youtube.com/watch?v=Ze9piW3wgYw">https://www.youtube.com/watch?v=Ze9piW3wgYw</a> |
| 34 | EkhartYoga                  | Yoga Exercises for Carpal Tunnel Syndrome                                           | <a href="https://www.youtube.com/watch?v=x3Yb0KVXcTE">https://www.youtube.com/watch?v=x3Yb0KVXcTE</a> |
| 35 | Mr Jeremy Read Hand Surgeon | Carpal tunnel release                                                               | <a href="https://www.youtube.com/watch?v=yHx_Cbf2tqo">https://www.youtube.com/watch?v=yHx_Cbf2tqo</a> |
| 36 | nabil ebraheim              | Carpal Tunnel Injection - Everything You Need To Know - Dr. Nabil Ebraheim          | <a href="https://www.youtube.com/watch?v=G4OanhAEZoM">https://www.youtube.com/watch?v=G4OanhAEZoM</a> |
| 37 | motivationaldoc             | How to Determine if You Really Have Carpal Tunnel Syndrome - Dr Mandell, DC         | <a href="https://www.youtube.com/watch?v=SSbcdh4SVpE">https://www.youtube.com/watch?v=SSbcdh4SVpE</a> |
| 38 | motivationaldoc             | Carpal Tunnel Syndrome: Fast Natural Relief in Minutes - Dr Alan Mandell, DC        | <a href="https://www.youtube.com/watch?v=ZBvZIsY-Kdc">https://www.youtube.com/watch?v=ZBvZIsY-Kdc</a> |

|    |                                                  |                                                                                                                                                   |                                                                                                       |
|----|--------------------------------------------------|---------------------------------------------------------------------------------------------------------------------------------------------------|-------------------------------------------------------------------------------------------------------|
| 39 | Jedediah Jones                                   | Hand Exam For Carpal Tunnel Syndrome                                                                                                              | <a href="https://www.youtube.com/watch?v=FRO78pJ8VXo">https://www.youtube.com/watch?v=FRO78pJ8VXo</a> |
| 40 | PreOp.com Patient Engagement - Patient Education | Carpal Tunnel Syndrome Repair Surgery - PreOp® Patient Education Medical HD                                                                       | <a href="https://www.youtube.com/watch?v=-vSgnYhoITc">https://www.youtube.com/watch?v=-vSgnYhoITc</a> |
| 41 | Medscape                                         | Carpal Tunnel Release   Surgical Procedure   Part I                                                                                               | <a href="https://www.youtube.com/watch?v=VROrnggbsek">https://www.youtube.com/watch?v=VROrnggbsek</a> |
| 42 | Massage Therapeutics                             | Forearm Anatomy: Help Relieve Carpal Tunnel Syndrome                                                                                              | <a href="https://www.youtube.com/watch?v=Kx9-ZDWmzKw">https://www.youtube.com/watch?v=Kx9-ZDWmzKw</a> |
| 43 | 3dmusclepep                                      | 3D CGI medical video carpal tunnel syndrome                                                                                                       | <a href="https://www.youtube.com/watch?v=u5dWTGYQ6PU">https://www.youtube.com/watch?v=u5dWTGYQ6PU</a> |
| 44 | Malek Racy                                       | Carpal Tunnel Release - Teaching Video                                                                                                            | <a href="https://www.youtube.com/watch?v=bLYLVNjP7H8">https://www.youtube.com/watch?v=bLYLVNjP7H8</a> |
| 45 | MedStar Health                                   | Surgery Video: Carpal Tunnel - MedStar Union Memorial                                                                                             | <a href="https://www.youtube.com/watch?v=jiUKeCLMS90">https://www.youtube.com/watch?v=jiUKeCLMS90</a> |
| 46 | CinnamonToastKen                                 | Carpal Tunnel Surgery                                                                                                                             | <a href="https://www.youtube.com/watch?v=P1sUe7g_9L0">https://www.youtube.com/watch?v=P1sUe7g_9L0</a> |
| 47 | Adam J. Story, DC                                | Carpal Tunnel Fix - DIY No brace!!                                                                                                                | <a href="https://www.youtube.com/watch?v=B9a8u16hIhQ">https://www.youtube.com/watch?v=B9a8u16hIhQ</a> |
| 48 | John Mahoney                                     | Carpal Tunnel Release for carpal tunnel syndrome, by John Mahoney, M.D., more at <a href="http://www.DoctorMahoney.com">www.DoctorMahoney.com</a> | <a href="https://www.youtube.com/watch?v=xuqcfRG2phk">https://www.youtube.com/watch?v=xuqcfRG2phk</a> |
| 49 | nandapillai                                      | Carpal Tunnel Syndrome Operation                                                                                                                  | <a href="https://www.youtube.com/watch?v=lxqqX2pDryQ">https://www.youtube.com/watch?v=lxqqX2pDryQ</a> |
| 50 | handarmdoc                                       | Recognizing Thumb Muscle Atrophy - Carpal Tunnel Syndrome                                                                                         | <a href="https://www.youtube.com/watch?v=ffCnKIZVJvQ">https://www.youtube.com/watch?v=ffCnKIZVJvQ</a> |
| 51 | Bob & Brad                                       | Top 3 Exercises to Perform AFTER Carpal Tunnel Surgery (Release)                                                                                  | <a href="https://www.youtube.com/watch?v=z7mGU7877SE">https://www.youtube.com/watch?v=z7mGU7877SE</a> |
| 52 | JoeCubicle                                       | One month after carpal tunnel surgery                                                                                                             | <a href="https://www.youtube.com/watch?v=MjjnVx65Wyg">https://www.youtube.com/watch?v=MjjnVx65Wyg</a> |
| 53 | CarpalRx                                         | Early symptoms and warning signs of carpal tunnel syndrome                                                                                        | <a href="https://www.youtube.com/watch?v=rnZEwSAYCdU">https://www.youtube.com/watch?v=rnZEwSAYCdU</a> |

|    |                    |                                                    |                                                                                                       |
|----|--------------------|----------------------------------------------------|-------------------------------------------------------------------------------------------------------|
| 54 | Rehab and Revive   | 5 Exercises to PREVENT and ALLEVIATE Carpal Tunnel | <a href="https://www.youtube.com/watch?v=pbHRK7jpr1M">https://www.youtube.com/watch?v=pbHRK7jpr1M</a> |
| 55 | Coordinated Health | Carpal Tunnel Release - Dr. Jon Hernandez          | <a href="https://www.youtube.com/watch?v=t6DWcLKygpy">https://www.youtube.com/watch?v=t6DWcLKygpy</a> |



|    |                       |                                                                                                   |   |   |   |   |   |   |   |   |   |  |  |  |  |  |   |  |   |   |   |   |   |   |   |   |   |
|----|-----------------------|---------------------------------------------------------------------------------------------------|---|---|---|---|---|---|---|---|---|--|--|--|--|--|---|--|---|---|---|---|---|---|---|---|---|
| 10 | Dr Thomas McClellan   | Live Surgery Open Carpal Tunnel Release Surgery.m4v                                               | 1 | 1 | 1 | 0 | 1 | 1 | 1 | 1 |   |  |  |  |  |  | 1 |  | 1 | 1 | 1 | 1 | 1 | 1 | 1 | 1 |   |
| 11 | Armando Hasudungan    | Clinical Anatomy - Hand, Wrist (palmar aspect/flexors)                                            | 1 | 1 | 1 | 0 | 1 | 1 | 1 | 1 |   |  |  |  |  |  |   |  |   |   |   |   |   |   |   |   |   |
| 12 | HM Massage            | Carpal Tunnel Self Massage Fix                                                                    | 0 | 0 | 1 | 0 | 1 |   | 1 | 1 |   |  |  |  |  |  | 1 |  |   |   |   |   |   |   |   |   |   |
| 13 | TheProactiveAthlete   | Carpal Tunnel Syndrome Exercises                                                                  | 1 | 0 | 1 | 0 | 1 | 1 |   | 1 | 1 |  |  |  |  |  | 1 |  |   |   |   |   |   |   |   |   |   |
| 14 | j7conley              | Carpal Tunnel Treatment - Relief Without Surgery                                                  | 0 | 0 | 1 | 0 | 1 | 1 | 1 | 1 |   |  |  |  |  |  | 1 |  | 1 | 1 | 1 |   |   |   |   |   |   |
| 15 | Blitz Esports LoL     | Carpal Tunnel in Esports, explained in 5 minutes                                                  | 1 | 0 | 1 | 0 | 1 |   | 1 | 1 | 1 |  |  |  |  |  | 1 |  | 1 | 1 | 1 |   |   |   |   | 1 |   |
| 16 | WorkSafeBC            | Carpal Tunnel Syndrome                                                                            | 0 | 0 | 1 | 0 | 1 | 1 | 1 | 1 |   |  |  |  |  |  |   |  |   |   |   |   |   |   |   |   |   |
| 17 | TheSurgerySquad       | Carpal Tunnel Surgery                                                                             | 1 | 1 | 1 | 0 | 1 |   | 1 | 1 | 1 |  |  |  |  |  |   |  |   |   | 1 | 1 |   |   |   | 1 | 1 |
| 18 | Physiotutors          | Phalen's Test  Carpal Tunnel Syndrome                                                             | 1 | 0 | 1 | 0 |   |   | 1 |   |   |  |  |  |  |  |   |  |   |   |   |   |   |   |   |   |   |
| 19 | Carpal Tunnel Gadgets | Carpal Tunnel Exercises using Stress Ball                                                         | 0 | 0 | 1 | 0 |   |   |   |   |   |  |  |  |  |  |   |  |   |   | 1 |   |   |   |   |   |   |
| 20 | Physiotutors          | Tinel Sign: Wrist  Carpal Tunnel Syndrome                                                         | 1 | 0 | 1 | 0 |   |   |   |   |   |  |  |  |  |  |   |  |   |   |   |   |   |   |   |   |   |
| 21 | Road                  | Wrist Exercises for Tendinitis Carpal Tunnel Syndrome - Avoid RSI injury in just 2 minutes a day! | 0 | 1 | 1 | 0 | 1 |   |   | 1 | 1 |  |  |  |  |  |   |  |   |   |   |   |   |   |   |   |   |





|    |                                |                                                                               |   |   |   |   |   |   |   |   |   |  |  |  |   |   |   |   |   |   |  |   |   |  |   |   |  |
|----|--------------------------------|-------------------------------------------------------------------------------|---|---|---|---|---|---|---|---|---|--|--|--|---|---|---|---|---|---|--|---|---|--|---|---|--|
| 30 | Vitality Massage               | Massage for Carpal Tunnel Syndrome - STOP Wrist Pain Fast!                    | 0 | 0 | 1 | 0 | 1 |   |   |   |   |  |  |  | 1 |   |   |   |   |   |  |   |   |  |   |   |  |
| 31 | motivationaldoc                | Carpal Tunnel Self-Correction Adjustment - Dr. Alan Mandell, D.C.             | 1 | 0 | 1 | 0 | 1 | 1 | 1 | 1 |   |  |  |  |   | 1 |   |   |   |   |  | 1 |   |  |   |   |  |
| 32 | Bob & Brad                     | What They Don't Tell You About Carpal Tunnel Syndrome! Stretches & Treatments | 1 | 0 | 1 | 0 | 1 | 1 | 1 | 1 | 1 |  |  |  |   | 1 | 1 |   |   |   |  | 1 | 1 |  |   |   |  |
| 33 | RMCrayne                       | Carpal Tunnel Syndrome Provocative Tests & Physical Exam                      | 1 | 0 | 1 | 0 | 1 |   | 1 | 1 |   |  |  |  |   |   |   |   |   |   |  |   |   |  |   |   |  |
| 34 | EkhartYoga                     | Yoga Exercises for Carpal Tunnel Syndrome                                     | 0 | 0 | 1 | 0 |   |   |   |   |   |  |  |  | 1 |   |   |   |   |   |  |   |   |  |   |   |  |
| 35 | Mr Jeremy Read<br>Hand Surgeon | Carpal tunnel release                                                         | 1 | 0 | 1 | 0 |   |   |   |   |   |  |  |  |   |   |   |   |   |   |  |   |   |  | 1 | 1 |  |
| 36 | nabil ebraheim                 | Carpal Tunnel Injection - Everything You Need To Know - Dr. Nabil Ebraheim    | 1 | 1 | 1 | 1 | 1 | 1 | 1 | 1 |   |  |  |  |   | 1 |   |   |   |   |  |   |   |  |   |   |  |
| 37 | motivationaldoc                | How to Determine if You Really Have Carpal Tunnel Syndrome - Dr Mandell, DC   | 1 | 1 | 1 | 0 | 1 | 1 | 1 | 1 | 1 |  |  |  |   | 1 |   |   |   |   |  |   |   |  |   |   |  |
| 38 | motivationaldoc                | Carpal Tunnel Syndrome: Fast Natural Relief in                                | 1 | 1 | 1 | 0 | 1 | 1 | 1 | 1 | 1 |  |  |  |   | 1 | 1 | 1 | 1 | 1 |  |   |   |  |   |   |  |

|    |                                                     | Minutes - Dr Alan Mandell, DC                                                    |   |   |   |   |   |   |   |   |   |  |  |  |  |  |  |  |  |  |  |  |  |  |  |  |  |  |  |  |  |  |  |  |  |  |  |  |  |  |  |  |  |  |  |  |  |  |  |  |  |  |  |  |  |  |
|----|-----------------------------------------------------|----------------------------------------------------------------------------------|---|---|---|---|---|---|---|---|---|--|--|--|--|--|--|--|--|--|--|--|--|--|--|--|--|--|--|--|--|--|--|--|--|--|--|--|--|--|--|--|--|--|--|--|--|--|--|--|--|--|--|--|--|--|
| 39 | Jedediah Jones                                      | Hand Exam For Carpal Tunnel Syndrome                                             | 1 | 1 | 1 | 0 | 1 | 1 | 1 | 1 |   |  |  |  |  |  |  |  |  |  |  |  |  |  |  |  |  |  |  |  |  |  |  |  |  |  |  |  |  |  |  |  |  |  |  |  |  |  |  |  |  |  |  |  |  |  |
| 40 | PreOp.com<br>Patient Engagement - Patient Education | Carpal Tunnel Syndrome Repair Surgery - PreOp® Patient Education Medical HD      | 1 | 0 | 1 | 0 | 1 | 1 | 1 | 1 |   |  |  |  |  |  |  |  |  |  |  |  |  |  |  |  |  |  |  |  |  |  |  |  |  |  |  |  |  |  |  |  |  |  |  |  |  |  |  |  |  |  |  |  |  |  |
| 41 | Medscape                                            | Carpal Tunnel Release [Surgical Procedure] Part I                                | 1 | 0 | 1 | 0 |   |   |   |   |   |  |  |  |  |  |  |  |  |  |  |  |  |  |  |  |  |  |  |  |  |  |  |  |  |  |  |  |  |  |  |  |  |  |  |  |  |  |  |  |  |  |  |  |  |  |
| 42 | Massage Therapeutics                                | Forearm Anatomy: Help Relieve Carpal Tunnel Syndrome                             | 1 | 0 | 1 | 0 | 1 | 1 | 1 |   |   |  |  |  |  |  |  |  |  |  |  |  |  |  |  |  |  |  |  |  |  |  |  |  |  |  |  |  |  |  |  |  |  |  |  |  |  |  |  |  |  |  |  |  |  |  |
| 43 | 3dmusclepep                                         | 3D CGI medical video carpal tunnel syndrome                                      | 0 | 0 | 1 | 0 | 1 | 1 | 1 |   |   |  |  |  |  |  |  |  |  |  |  |  |  |  |  |  |  |  |  |  |  |  |  |  |  |  |  |  |  |  |  |  |  |  |  |  |  |  |  |  |  |  |  |  |  |  |
| 44 | Malek Racy                                          | Carpal Tunnel Release - Teaching Video                                           | 1 | 1 | 1 | 1 | 1 | 1 | 1 | 1 |   |  |  |  |  |  |  |  |  |  |  |  |  |  |  |  |  |  |  |  |  |  |  |  |  |  |  |  |  |  |  |  |  |  |  |  |  |  |  |  |  |  |  |  |  |  |
| 45 | MedStar Health                                      | Surgery Video: Carpal Tunnel - MedStar Union Memorial                            | 1 | 1 | 1 | 1 | 1 | 1 | 1 | 1 |   |  |  |  |  |  |  |  |  |  |  |  |  |  |  |  |  |  |  |  |  |  |  |  |  |  |  |  |  |  |  |  |  |  |  |  |  |  |  |  |  |  |  |  |  |  |
| 46 | CinnamonToastKen                                    | Carpal Tunnel Surgery                                                            | 0 | 0 | 1 | 0 | 1 | 1 | 1 | 1 | 1 |  |  |  |  |  |  |  |  |  |  |  |  |  |  |  |  |  |  |  |  |  |  |  |  |  |  |  |  |  |  |  |  |  |  |  |  |  |  |  |  |  |  |  |  |  |
| 47 | Adam J. Story, DC                                   | Carpal Tunnel Fix - DIY No brace!!                                               | 0 | 0 | 1 | 0 | 1 | 1 | 1 |   |   |  |  |  |  |  |  |  |  |  |  |  |  |  |  |  |  |  |  |  |  |  |  |  |  |  |  |  |  |  |  |  |  |  |  |  |  |  |  |  |  |  |  |  |  |  |
| 48 | John Mahoney                                        | Carpal Tunnel Release for carpal tunnel syndrome, by John Mahoney, M.D., more at | 0 | 0 | 1 | 0 |   |   |   |   |   |  |  |  |  |  |  |  |  |  |  |  |  |  |  |  |  |  |  |  |  |  |  |  |  |  |  |  |  |  |  |  |  |  |  |  |  |  |  |  |  |  |  |  |  |  |
